# Supplementary material for: One-Step Dry Coating of Hybrid ZnO–WO3 Nanosheet Photoanodes for Photoelectrochemical Water Splitting with Composition-Dependent Performance
Source: MDPI journal article supplement (doi:10.3390/mi14122189), 2023-11-30
Supplement: s1 [file s1]

## Supporting Information

# One-step dry coating of hybrid ZnO-WO<sub>3</sub> nanosheet photoanodes for photoelectrochemical water splitting with composition-dependent performance

Muhammad Shehroze Malik <sup>a</sup>, Deepto Roy <sup>a</sup>, Doo-Man Chun <sup>a, \*</sup>, and A. G. Abd-Elrahim <sup>a, b</sup>

<sup>a</sup> School of Mechanical Engineering, University of Ulsan, Ulsan, 44610, Korea

<sup>b</sup> Physics Department, Faculty of Science, Assiut University, Assiut 71516, Egypt

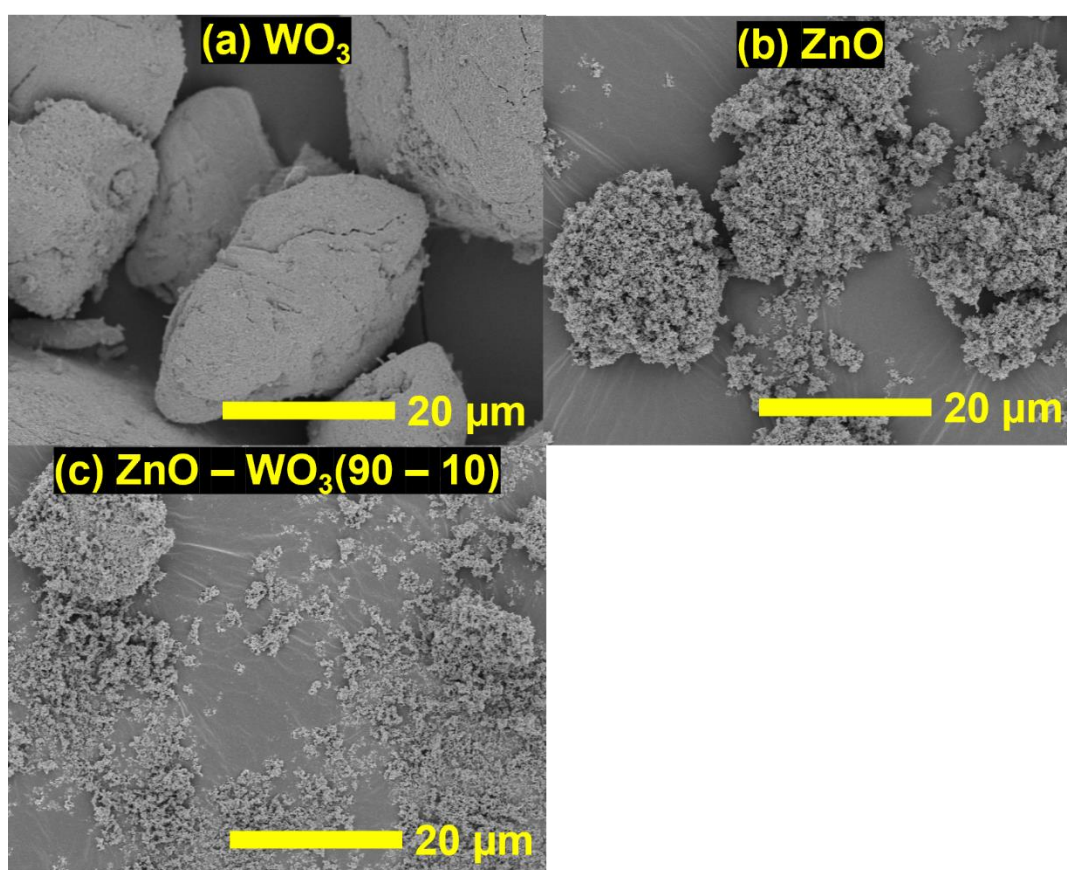

**Figure S1:** Scanning electron microscopy images of ZnO powder (a), WO<sub>3</sub> powder (b), and ZnO–WO<sub>3</sub> composite powder with 10% WO<sub>3</sub> content (c)

---

\* Corresponding Author: dmchun@ulsan.ac.kr (Doo-Man Chun)

Table S1. The average consumable time for different material coatings in different techniques.

| Coating Techniques                      | Material               | Average Consumable Time (Hours) | Ref      |
|-----------------------------------------|------------------------|---------------------------------|----------|
| Nanoparticle Deposition System (NPDS)   | ZnO-WO <sub>3</sub>    | 0.5                             | Our work |
| Sol-gel method+ Hummer's method         | ZnO – Graphene Oxide   | 6.5                             | [1]      |
| Aqueous chemical method                 | ZnO                    | 11.3                            | [2]      |
| Hydrothermal and cation exchange method | ZnO/CuInS <sub>2</sub> | 16                              | [3]      |
| Solvothermal method                     | ZnO-WO <sub>3-x</sub>  | 21                              | [4]      |

## References:

- [1] M. Ghorbani, H. Abdizadeh, M. Taheri, M.R. Golobostanfard, Enhanced photoelectrochemical water splitting in hierarchical porous ZnO/Reduced graphene oxide nanocomposite synthesized by sol-gel method, *Int. J. Hydrogen Energy*. 43 (2018) 7754–7763. <https://doi.org/10.1016/j.ijhydene.2018.03.052>.
- [2] R. Lv, T. Wang, F. Su, P. Zhang, C. Li, J. Gong, Facile synthesis of ZnO nanopencil arrays for photoelectrochemical water splitting, *Nano Energy*. 7 (2014) 143–150. <https://doi.org/10.1016/j.nanoen.2014.04.020>.
- [3] Y. Li, Z. Liu, Y. Wang, Z. Liu, J. Han, J. Ya, ZnO/CuInS<sub>2</sub> core/shell heterojunction nanoarray for photoelectrochemical water splitting, *Int. J. Hydrogen Energy*. 37 (2012) 15029–15037. <https://doi.org/10.1016/j.ijhydene.2012.07.117>.
- [4] Y. Chen, L. Wang, R. Gao, Y.C. Zhang, L. Pan, C. Huang, K. Liu, X.Y. Chang, X. Zhang, J.J. Zou, Polarization-Enhanced direct Z-scheme ZnO-WO<sub>3-x</sub> nanorod arrays for efficient piezoelectric-photoelectrochemical Water splitting, *Appl. Catal. B Environ*. 259 (2019) 118079. <https://doi.org/10.1016/j.apcatb.2019.118079>.
